# Supplementary material
Source: ML conference proceedings conference paper supplement (https://openaccess.thecvf.com/content/CVPR2023/html/Li_ACSeg_Adaptive_Conceptualization_CVPR_2023_paper.html)
Supplement: Supplementary file 1 [file Li_ACSeg_Adaptive_Conceptualization_CVPR_2023_supplemental.zip]

Archive with 2 entries (2 files):
- acseg_appendix.pdf
- acseg_video.mp4
